# Supplementary material
Source: MDPI journal article supplement (https://www.mdpi.com/1661-3821/3/1/6)
Supplement: s1 [file s1]

# Amber Extract Suppressed Mast Cell-Mediated Allergic Inflammation via the Regulation of Allergic Mediators—An In Vitro Study

Redoyan Refli <sup>1</sup>, Neng Tanty Sofyana <sup>2</sup>, Haruna Haeiwa <sup>3</sup>, Reiko Takeda <sup>2,3</sup>, Kazuma Okazaki <sup>3</sup>, Marie Sekita <sup>3</sup> and Kazuichi Sakamoto <sup>1,2,\*</sup>

**Table S1.** Primers used for qRT-PCR

| Genes                          | Direction       | Primer                                  |
|--------------------------------|-----------------|-----------------------------------------|
| <i>GAPDH</i>                   | Forward (5'-3') | CCA CAG TCC ATG CCA TCA<br>C            |
|                                | Reverse (3'-5') | TCC ACC ACC CTG TTG CTG<br>TA           |
| <i>IL-4</i>                    | Forward (5'-3') | TGA TGT ACC TCC CTG CTT<br>GA           |
|                                | Reverse (3'-5') | AGG ACA TGG AAG TGC AGG<br>AC           |
| <i>IL-6</i>                    | Forward (5'-3') | ACA AGT CCG GAG AGG AGA<br>CT           |
|                                | Reverse (3'-5') | TTG CCA TTG CAC AAC TCT<br>TTT C        |
| <i>IL-13</i>                   | Forward (5'-3') | CTG GAA TCC CTG ACC AAC<br>AT           |
|                                | Reverse (3'-5') | CCA TAG CGG AAA AGT TGC<br>TT           |
| <i>COX-2</i>                   | Forward (5'-3') | CCC ATG TCA AAA CCG TGG<br>TG           |
|                                | Reverse (3'-5') | CTG TGT TTG GGG TGG GCT<br>TC           |
| <i>TNF-<math>\alpha</math></i> | Forward (5'-3') | GCA TGA TCC GAG ATG TGG<br>AA           |
|                                | Reverse (3'-5') | ACG AGC GGG AAT GAG AAG<br>AG           |
| <i>NF-<math>\kappa</math>B</i> | Forward (5'-3') | TGC TCC AGG CAA TCC AGA<br>AG           |
|                                | Reverse (3'-5') | GTT GCC TCC AGA TCC ACA<br>AAC          |
| <i>ERK1</i>                    | Forward (5'-3') | CTACACGCAGCTGCAG-<br>TACATC             |
|                                | Reverse (3'-5') | GTGCGCTGACAGTAGGTTTGA<br>GCGTTGG-       |
| <i>ERK2</i>                    | Forward (5'-3') | TACAGAGCTCCAGAA<br>TGCAGCCCCACAGACCAAA- |
|                                | Reverse (3'-5') | TATC                                    |
| <i>P38</i>                     | Forward (5'-3') | CGAAATGACCGGCTACGTGG                    |
|                                | Reverse (3'-5') | GACTTCATCGTAGGTCAGGC                    |

|                                                      |                 |                                               |
|------------------------------------------------------|-----------------|-----------------------------------------------|
| <i>JNK</i>                                           | Forward (5'-3') | TGATGACGCCTTACGTGGTA                          |
|                                                      | Reverse (3'-5') | GGCAAACCATTTCTCCCATA<br>TGAC-                 |
| <i>I-<math>\kappa</math>B-<math>\alpha</math></i>    | Forward (5'-3') | CATGGAAGTGATTGGTCAG                           |
|                                                      | Reverse (3'-5') | GATCACAGCCAAGTGGAG-<br>TGGA<br>AGACCTGGAGCAA- |
| <i>NF-<math>\kappa</math>B<br/>p65</i>               | Forward (5'-3') | GCCATTAG<br>CGGACCG-                          |
|                                                      | Reverse (3'-5') | CATTCAAGTCATAG<br>AGATGCCGTAGCTGGAA-<br>GAAA  |
| <i>Fc<math>\epsilon</math>RI-<math>\alpha</math></i> | Forward (5'-3') | AATGATGGGAAAATGAGTT-                          |
|                                                      | Reverse (3'-5') | GTAGC                                         |

---
